# Supplementary material
Source: PubMed Central journal article supplement (PMC8760171)
Supplement: NIHMS1766485-supplement-5.pdf [file NIHMS1766485-supplement-5.pdf]

| <b>Gene</b> | <b>Accession Number</b> | <b>Target Sequence</b>                                                                                    |
|-------------|-------------------------|-----------------------------------------------------------------------------------------------------------|
| ACAN        | XM_013158932.2          | AAACTTCTGCCTCTGGAGTAGAGGAAGTGAGTGGATTCCTTCTGGAGAAG<br>GTCTAGAGACTTCTACCTCTGGAATAGGGGAAGTCAGTGGGCTTCCTTC   |
| ACTB        | NM_001172909.1          | TGCTTCTAGGCGGACTGTTACTACTTTGCTGCGTTACACCCTTTCTTGACAAA<br>AAAACCTAACTTGCGCGCAGAAAACGAGATGAGATTGGCATGGCTTT  |
| BAD         | XM_013150725.2          | GAAGCGCTCTGTGATTAACCGTTCCTCTGCCAGCGCCCTTTCTAAGGTGACG<br>CTGCACACCTGTGCTCCGCACAACTTGTTAATAAAGTGCAGTCTGTG   |
| BAK         | XM_013156999.2          | GGGTTTCGGGAGAAATTCTTGATGAAGCCAAATGCATGGAGAGGTTGCAGGT<br>GGTGCCTGCTAGCCCATCCTCTGATGGTATTGAAATAAACCGTGCAATG |
| BAX         | XM_003465527.4          | CGAGAGGTCTTTTTCCGAGTGGCAGCTGAAATGTTCGCTGATGGCAACTTCA<br>ACTGGGGCCGGGTTGTCGCCCTTTTCTATTTTGCCAGCAAACCTGGTGC |
| BCL-2       | XM_003474076.3          | CAAAGTGATGAATATGGAATATCAAATCCTGTGCTGCTATCCTGCCAAGCTC<br>ATCTTAATGGAGTCAGATTGCAGTACGCTTCCAAGTGACAAGATCCTC  |
| Caspase-3   | XM_003469171.4          | TCTCCTGGGACATGAATCACCCCTTTCTCTGGTGTACCCATGTTGTTATTCCT<br>CAGTGACCATCTCAGTTAGCAGATCGATTACCAGCCAGTACAGTACT  |

| <b>Gene</b> | <b>Accession Number</b> | <b>Target Sequence</b>                                                                                    |
|-------------|-------------------------|-----------------------------------------------------------------------------------------------------------|
| Caspase-8   | XM_013145226.2          | TCCAAGTGCCCTTCCCTTGCTGGAAAACCAAAAGTGTTCTTTATTCAGGCTT<br>GTCAAGGGGAGAAGCTTCCAGAAAGCTATATCTGTGGAGACTGACTCAG |
| Caspase-9   | XM_003471180.4          | GGAGCCCTTAGACCAGCCCGATGCAGTGTGAGTTTGCCCACACCCAGTGA<br>CATCCTTGTGTCCTACTCTACCTTCCCAGGTTTTGTCTCCTGGAGGAAC   |
| COL2A1      | XM_005006506.3          | TCTAGGATTCTGCACTGAATGGCTGACCTGACCTGATGTCATTCATCCCACC<br>CACTCACAGTTTGGACTGTTCTCCCTTCTCTTTCTAAGAGACCTGAAC  |
| EEF1A1      | XM_003477900.3          | CTAATTGTCGGTGTTAACAAAATGGATTCCACTGAGCCACCCTACAGCCAG<br>AAGAGATACGAGGAAATTGTTAAGGAAGTCAGCACCTACATTAAGAAAA  |
| FTH         | NM_001172847.1          | ACCTGTCCATGTCTTACTACTTTGACCGCGATGATGTGGCTTTGAAGAACTT<br>CGCCAAATACTTCCTTCACCAATCTCATGAGGAGAGGGAACATGCAGA  |
| HAMP        | XM_003466576.4          | AGCCCTAGACACCAGAGCAAGTCTTCGACCCAACAGGTTGGCCAGACAGAC<br>AGCATGATGGCACTGTACTCAGATCCGGGCTGCCTGCCTCCTGGTCC    |
| MMP-2       | XM_003477541.4          | GGAGATCTGCAAACAGGACATCGTCTTTGATGGCATCTCTCAGATCCGTGGT<br>GAGATCTTCTTCTTCAAGGACCGGTTCAATTTGGAGAACAGTGACACCA |

| <b>Gene</b>    | <b>Accession Number</b> | <b>Target Sequence</b>                                                                                     |
|----------------|-------------------------|------------------------------------------------------------------------------------------------------------|
| MMP-9          | XM_003467793.3          | GTGCACATGTTTCGACGCCATTGCGGAGATCCAGAACTATCTGCATTTCTTCA<br>AGGACGGGTGGTACTGGAAGTTTTCTGAGGGCCGAAGGCGACGGCTGC  |
| MMP-13         | XM_003472818.3          | AGCGCTCATGTTTCCCGTCTATACCTACACTGACAAGAGCCATTTTGTGCTT<br>CCTGATGATGATGTCCAAGGGATCCAGTCTCTCTATGGTCCAGGAGAT   |
| SLC11A2/DMT1   | XM_013159181.2          | TGGCCAGTTTGTTCATGGAGGGATTCCCTGAACCTAAGATGGTCCCGATTTGCC<br>CGAGTGATTCTGACTCGCTCTATTGCCATCATTCCCACCCTGCTTGTT |
| SLC39A14/ZIP14 | XM_005008109.2          | ACAGGGGAGGGAAAGCCGAGCTCCCTCGAAGTGTGGGGATACGGTATCCTC<br>TGTGTCACCGTCATCTCCCTCTGCTCCCTCATGGGGGCCAGCGTGGTGC   |
| SLC40A1/FPN    | XM_005008713.3          | CTGTGACACAGTTGCTGCAAGAGAATGTAATTGAGTCTGAAAGAGGCATTA<br>TAAACGGTGTACAGAACTCCATGAACTACCTTCTGGATCTCCTGCACTT   |
| TFR1           | NM_001251822.1          | CTGTAAGGACTCAGCTGGTCTCCGCATCCCTGAGTGAAACAGTTAGGTTTCAG<br>AGAGATAGGTCTTATTTTCTTGCCAACAAGGCCTGAAATACAGAGGTC  |
| TIMP-2         | NM_001173024.1          | TAGATAATGTGTGAACGCAAGCTGCAGGTTTGCCAAGATGCGCTTCTGTTTC<br>TTACGTCACAAAGATTACCCATTTAAAGACACAGGGAAGTACAGGGAACC |
